# Supplementary material for: Graphyne-supported single Fe atom catalysts for CO oxidation
Source: Royal Society of Chemistry journal article supplement (doi:10.1039/c4cp04181j), 2014-10-20
Supplement: c4cp04181j1.pdf [file c4cp04181j1.pdf]

Electronic supplementary information:

# Graphyne-supported single Fe atom catalysts for CO oxidation

Ping Wu,\* Pan Du, Hui Zhang and Chenxin Cai\*

Jiangsu Key Laboratory of New Power Batteries, Jiangsu Collaborative Innovation Center of Biomedical Functional Materials, College of Chemistry and Materials Science, Nanjing Normal University, Nanjing 210097, P. R. China.

\* Corresponding author, E-mail: [wuping@njnu.edu.cn](mailto:wuping@njnu.edu.cn) (P. Wu); [cxcai@njnu.edu.cn](mailto:cxcai@njnu.edu.cn) (C. Cai)

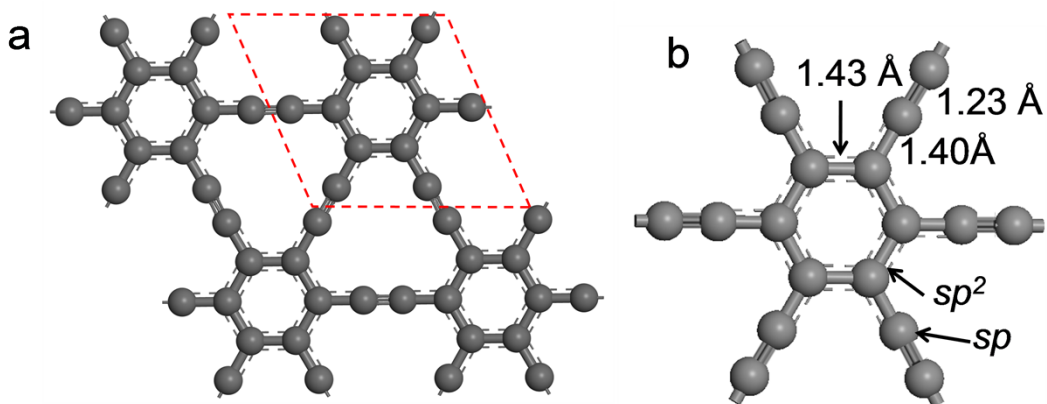

**Fig. S1** (a)  $2 \times 2$  supercells of the optimized graphyne single layer. The structure selected by dashed line represents primitive cell. (b) The primitive cell of graphyne.

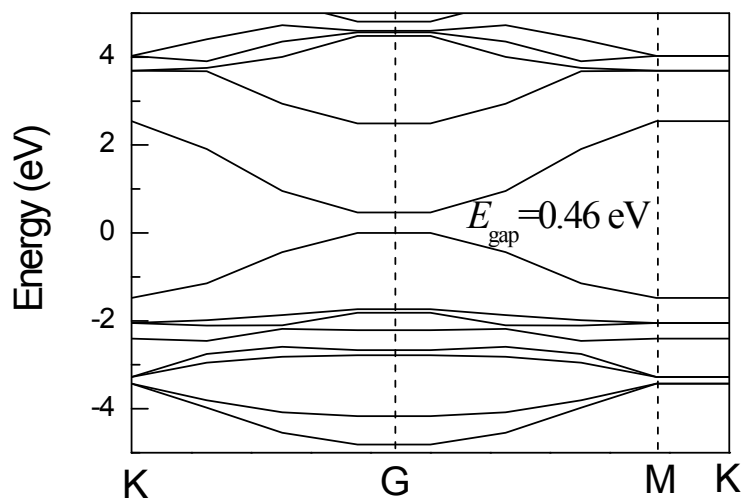

**Fig. S2** Band structure of graphyne.

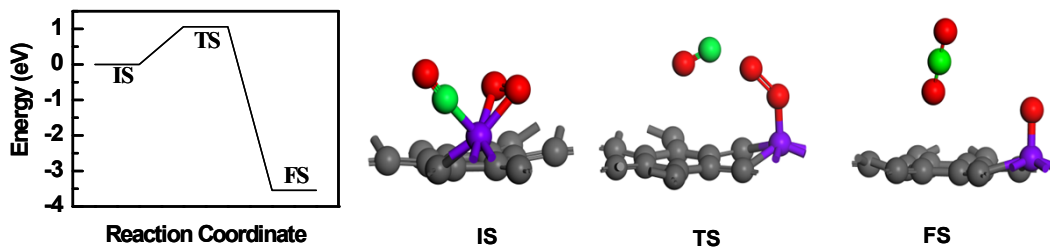

**Fig. S3** Configurations of each state and minimum energy profiles for CO oxidation reaction on Fe-graphyne sheet along LH mechanism, including initial state (IS), transition state (TS), and final state (FS). Atomic color code: gray, carbon; red, oxygen.

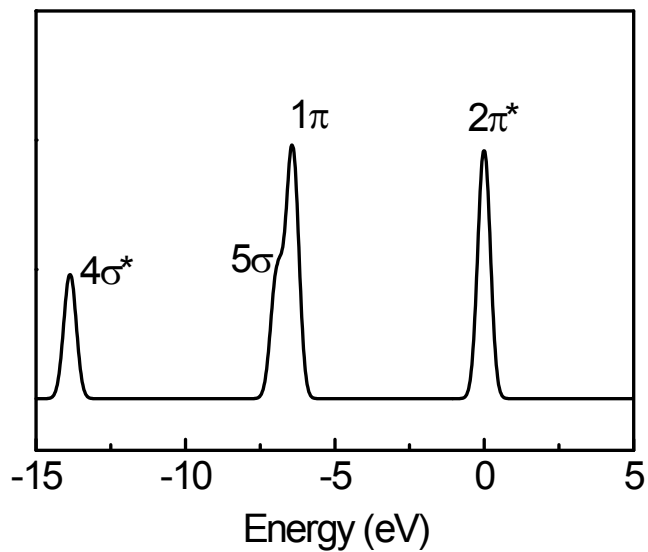

**Fig. S4** LDOS of the isolated O<sub>2</sub> molecule.

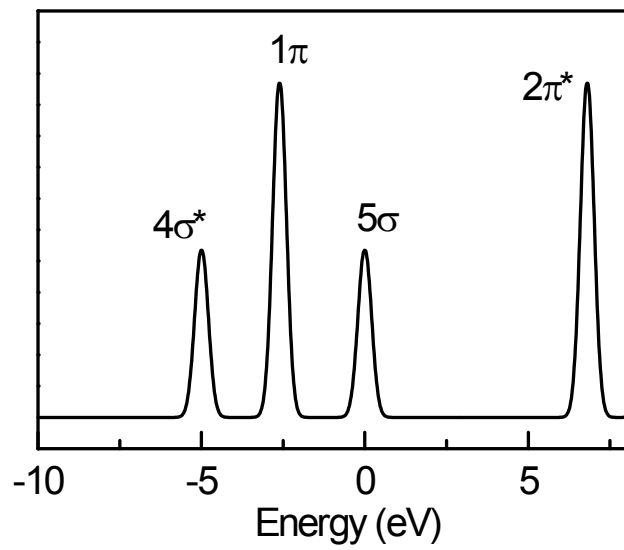

**Fig. S5** LDOS of the isolated CO molecule.
